# Supplementary material for: Population Study Reveals Genetic Variation and Introgression of Four Deciduous Oaks at the Junction between Taihang Mountain and Yanshan Mountain
Source: MDPI journal article supplement (doi:10.3390/f13101647), 2022-10-08
Supplement: s1 [file s1]

## Supplementary Materials

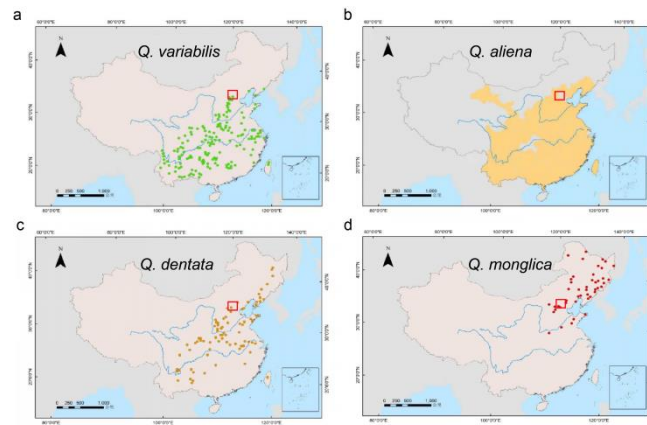

**Figure S1.** Distribution map of *Q. variabilis* (a), *Q. aliena* (b), *Q. dentata* (c) and *Q. mongolica* (d) respectively in China. The red squares represent Beijing area. This figure is modified from Wang et al.[28].

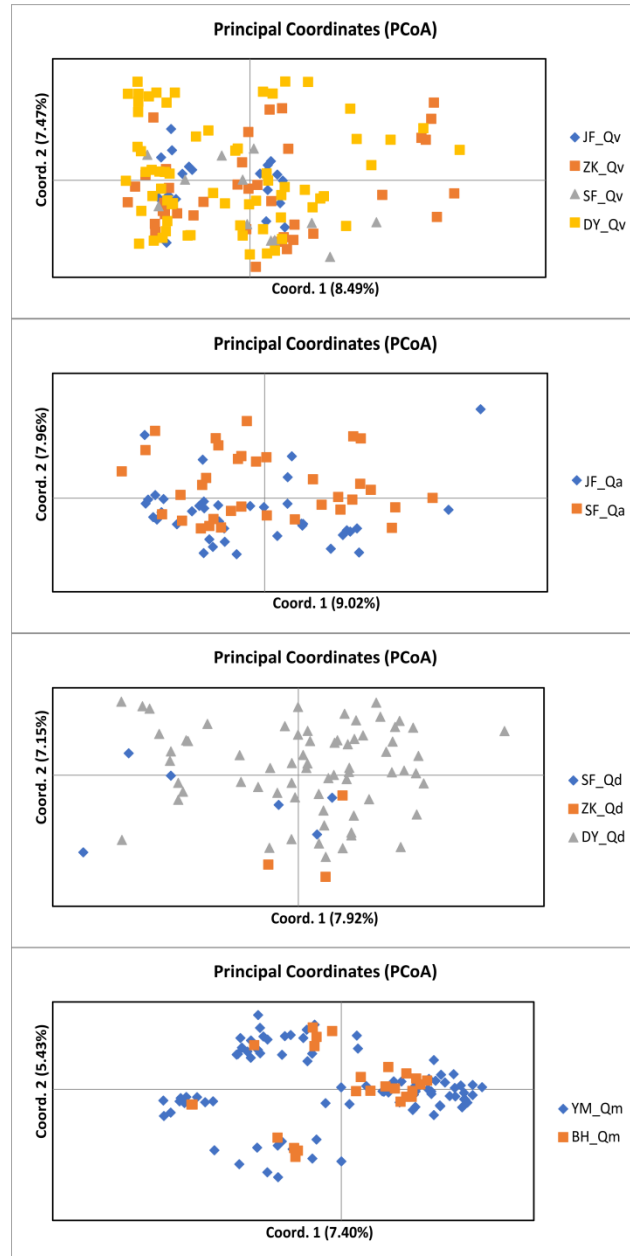

**Figure S2.** PCoA analysis of different populations within the same species. Different color and shape of the dots indicate the different populations.

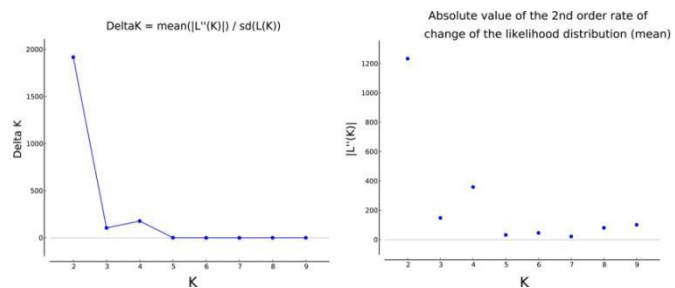

**Figure S3.**  $\Delta K$  and  $\ln PPK$  values are showed with blue dot. The values are calculated according to  $K = 1$  to 10.

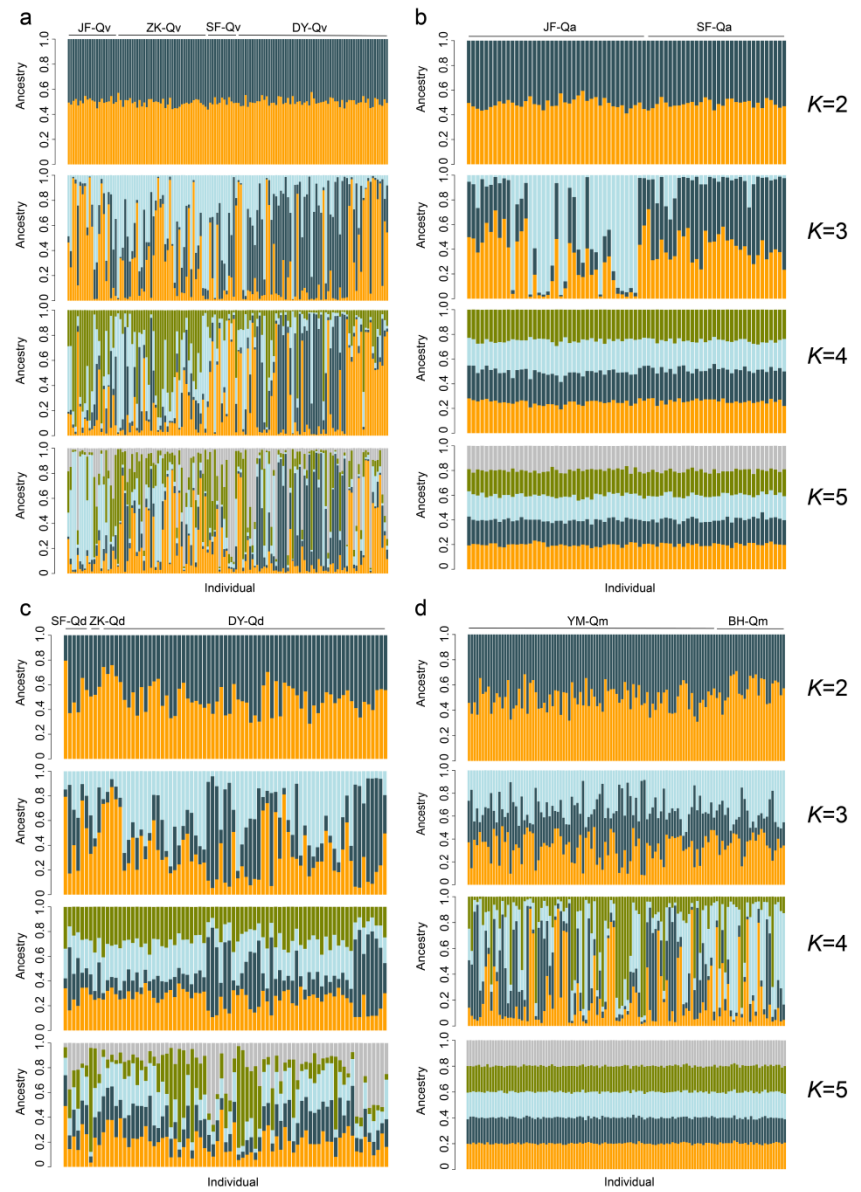

**Figure S4.** STRUCTURE analysis of 4 native oaks when  $K = 2$  to 5. *Q. variabilis* (a), *Q. aliena* (b), *Q. dentata* (c) and *Q. mongolica* (d) respectively.

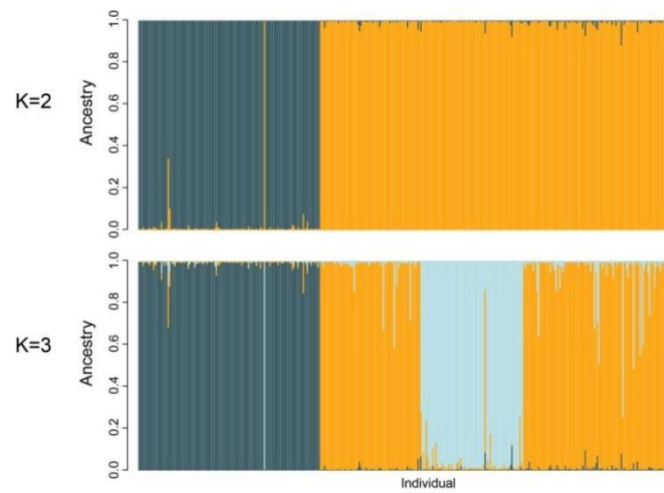

**Figure S5.** STRUCTURE analysis of populations when K = 2 and K = 3. Dark blue background shows *Q. variabilis* cluster.

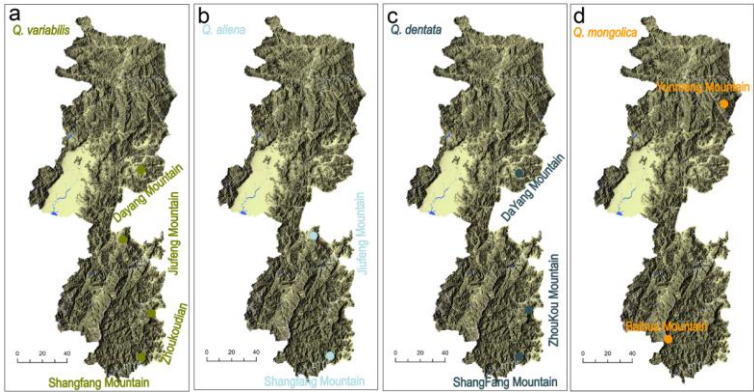

**Figure S6.** The sampling regions of four native oaks. *Q. variabilis* (a), *Q. aliena* (b), *Q. dentata* (c) and *Q. mongolica* (d) respectively.

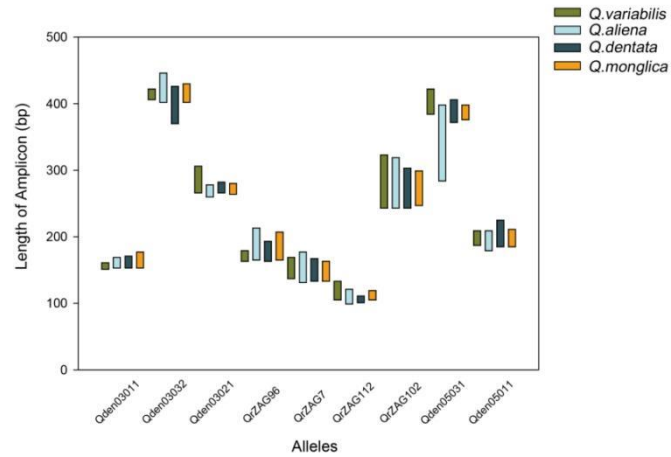

**Figure S7.** Length variety of the amplicons of each allele in different oak species. Green, blue, cyan and orange bars indicate length variety of each allele in *Q. variabilis*, *Q. aliena*, *Q. dentata* and *Q. mongolica* respectively.

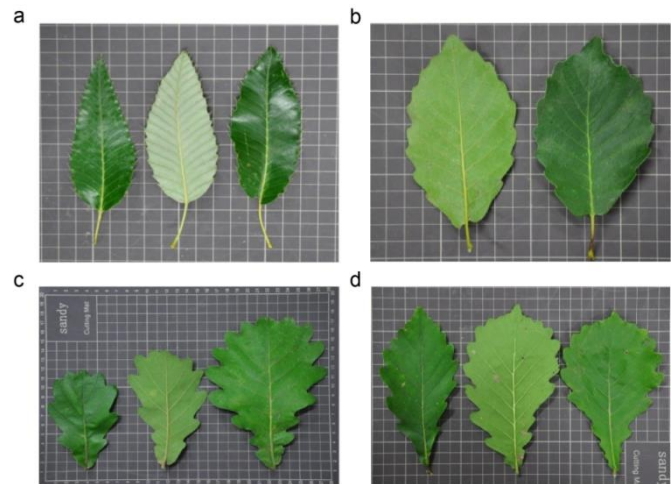

**Figure S8.** Leaf surface and back of *Q. variabilis* (a), *Q. aliena* (b), *Q. dentata* (c) and *Q. mongolica* (d) respectively.

**Table S1.** Main genetic parameters for the chosen 9 SSR primers.

| Locus <sup>1</sup> | Na   | Ne    | Ho   | He   | I    | F    |
|--------------------|------|-------|------|------|------|------|
| QrZAG96            | 27   | 7.47  | 0.64 | 0.87 | 2.45 | 0.26 |
| QrZAG102           | 38   | 22.37 | 0.59 | 0.96 | 3.28 | 0.38 |
| QrZAG112           | 23   | 7.44  | 0.65 | 0.87 | 2.36 | 0.25 |
| QrZAG7             | 24   | 12.02 | 0.82 | 0.92 | 2.71 | 0.10 |
| Qden03011          | 13   | 7.75  | 0.72 | 0.87 | 2.18 | 0.17 |
| Qden03032          | 20   | 7.30  | 0.39 | 0.86 | 2.34 | 0.55 |
| Qden03021          | 13   | 5.31  | 0.47 | 0.81 | 1.83 | 0.43 |
| Qden05011          | 24   | 8.77  | 0.76 | 0.89 | 2.41 | 0.14 |
| Qden05031          | 33   | 5.74  | 0.45 | 0.83 | 2.35 | 0.46 |
| Mean               | 23.9 | 9.35  | 0.61 | 0.87 | 2.43 | 0.30 |

<sup>1</sup>Locus are the name of the 9 SSR markers. Na, Ne, Ho, He, I, F are main genetic parameters. Na: average number of alleles. Ne: number of effective alleles. Ho: observed heterozygosity. He: expected heterozygosity. I: Shannon's index. F: inbreeding coefficient.

**Table S2.** Sample information.

|                                                 | <i>Q. variabilis</i> | <i>Q. aliena</i> | <i>Q. dentata</i> | <i>Q. mongolica</i> | Total |
|-------------------------------------------------|----------------------|------------------|-------------------|---------------------|-------|
| Dayang Mountain<br>(40°18'50"N, 116°25'26"E)    | 65<br>(DY-Qv)        | -                | 68<br>(DY-Qd)     | -                   | 133   |
| Yunmeng Mountain<br>(40°32'55"N, 116°41'18"E)   | -                    | -                | -                 | 88<br>(YM-Qm)       | 88    |
| Baihua Mountain<br>(39°49'59"N, 115°34'43"E)    | -                    | -                | -                 | 25<br>(BH-Qm)       | 25    |
| Jiufeng<br>(40°03'25"N, 116°04'55"E)            | 21<br>(JF-Qv)        | 39<br>(JF-Qa)    | -                 | -                   | 60    |
| Shangfang Mountain<br>(39°40'18"N, 115°48'59"E) | 12<br>(SF-Qv)        | 35<br>(SF-Qa)    | 6<br>(SF-Qd)      | -                   | 53    |
| Zhoukoudian<br>(39°44'44"N, 115°54'3"E)         | 38<br>(ZK-Qv)        | -                | 3<br>(ZK-Qd)      | -                   | 41    |
| Total                                           | 136                  | 74               | 77                | 113                 | 400   |

<sup>1</sup>Samples from Jiufeng are artificial populations.

**Table S3.** Information of the 9 SSR primers.

| Primer Name | Primer Sequence (5' to 3') | Motif  |
|-------------|----------------------------|--------|
| QrZAG96-F   | CCCAGTCACATCCACTACTGTCC    | (TC)20 |
| QrZAG96-R   | GGTTGGGAAAAGGAGATCAGA      |        |
| QrZAG102-F  | GCCTACACTCTTCAATCTACATGA   | (GA)29 |
| QrZAG102-R  | GACTTGTAACACCTTAAGCATTATCT |        |
| QrZAG112-F  | TTCTTGCTTTGGTGCGCG         | (GA)32 |
| QrZAG112-R  | GTGGTCAGAGACTCGGTAAGTATTC  |        |
| QrZAG7-F    | CAACTTGGTGTTCCGGATCAA      | (TC)17 |
| QrZAG7-R    | GTGCATTTCTTTTATAGCATTCAC   |        |
| Qden03011-F | AACCCAACCTTCCCTTCATC       | (AG)8  |
| Qden03011-R | GCAGTGGTGCTAATGTAGAC       |        |
| Qden03021-F | ACAGCAAACCAGACTCCAC        | (AG)8  |
| Qden03021-R | CCCCAAAGTTTCGGCTAATAC      |        |
| Qden03032-F | AGTTGTGGTCCTGCTCGC         | (CT)12 |
| Qden03032-R | GAAAAGTGCGATGACGGTTG       |        |
| Qden05011-F | CCCACTCCCTGTCCATTGT        | (CT)8  |

|             |                       |        |
|-------------|-----------------------|--------|
| Qden05011-R | CACTGTGTGCTGCGACTTG   |        |
| Qden05031-F | CCCCGATTGCGCCATCATTGT |        |
| Qden05031-R | GTAACGCCGTTTTTCTCCACC | (GT)12 |

**Table S4.**DNA fingerprints of 400 samples.

| Sample No. | DNA Fingerprint <sup>1</sup>                                         |
|------------|----------------------------------------------------------------------|
| 1          | A167B125-129C139-143D249E155-157F268-270G406H187-195I400-410         |
| 2          | A165-167B125-129C139-145D267-279E153-157F270-274G406H189-195I396-410 |
| 3          | A165-167B119C139-169D245-247E153-157F268G406H195-199                 |
| 4          | A165-167B109-125C137-169E151-153F268G406H199                         |
| 5          | A167B111-117C137-139D267-275E153-155F270-272G406H189-197             |
| 6          | A165-167B111-119C137-139E151-153F268G406-412H195                     |
| 7          | A165-167B109-119C137-159E151-153F268-272G406H195-199I396-400         |
| 8          | A165-167B109-119C137-169D253E151-153F306G406H189-193I396-402         |
| 9          | A165-167B119-129C143-169D259-269E153-155F270-274G406H189-195         |
| 10         | A165-167B117-125C139-169D253E151-153F268G406H189-193                 |
| 11         | A165-167B119-125C139-169D279E153F266-268G406H189-199                 |
| 12         | A165-167B125-131C137-149D269-281E153F270G406H189I404-422             |
| 13         | A167B111-121C137-147D277E155F270G406H187                             |
| 14         | A165-167B111C137-151E151-153F268-272G406H189-193I399                 |
| 15         | A165-167B119-125C137-139D249-271E153-155F268G406H189-199             |
| 16         | A165-167B119-129C137-151D249-271E153F270-272G406H193-197I400         |
| 17         | A167B125C137-141D245-247E151-155F266G406H189-193I400-404             |
| 18         | A167B109-119C137-139D273E157-159F268G406H195I402-410                 |
| 19         | A165-167B109-131C139D247-273E151-155F266-270G406H189I422             |
| 20         | A165-167B109-129C137-141D249-287E153-155F270G406H189-197             |
| 21         | A165-167B117-131C139E151-155F266G406H189-199                         |
| 22         | A167B117-125C141-143D293-295E151F266-272G408H189-193I394-400         |
| 23         | A165-167B109-122C139D291F272-274G416H187-195I400                     |
| 24         | B105-119C137-139D255E155F268H189-193                                 |
| 25         | A165B115-125C139D247-289E153F266G406H195-205I420-422                 |
| 26         | A167B113-115C139D299E153-155F266-270G406H195-197                     |
| 27         | A167C139-143D251-261E153F268-272G408H187I404-412                     |
| 28         | A165-167C141-145E151-153F272G408H187-195I398-404                     |
| 29         | A167B113-125C141D245-247E151-153F266-270G408H189                     |
| 30         | A163-167B109-119C137-139D267-269E153F268G408-414H189-193             |
| 31         | A165-167B123-125C137-139D257-277E153F266G406H189                     |
| 32         | A167C139-141D261-263E151-153G408-414H187-195I404                     |
| 33         | A165-167B127-129C137-151D251-273E153-155F268-272G406H189-197         |
| 34         | A167B119-121C137-141D267-269E151-155F268-272G408H189I404-406         |
| 35         | A165-167B119-133C137-139E155F270-272G406H193-195                     |
| 36         | A167B115-125C137-139D257-263E155F266G406H189-195                     |
| 37         | A167B111-129C139D247E155G408H189I400-410                             |
| 38         | A167B119-127D251-285E153F268G406H193-197I396-400                     |
| 39         | A167B109C137-139E151-155F268G406H193-195                             |

---

|    |                                                                      |
|----|----------------------------------------------------------------------|
| 40 | A165-167B119-125C139-141D249E151F270-272G406H195                     |
| 41 | A167B109-121C137-139D251-257E155F268-272G406H195-197                 |
| 42 | A165-167B109-113C139-143D271-273E153-155F266-272G406H189-195I400-406 |
| 43 | A165-167B109C137-147E155F272G406H189-193                             |
| 44 | A165B109-121C137-141D253E155-157F268-272G406H195I400-402             |
| 45 | A167B109-119C141D251E155-157F270G406H189-195I400-406                 |
| 46 | A165-167B113-119C137-147D251-299E155-157F272G406H189                 |
| 47 | A165-167B113C137E153-155F270G406H195-199                             |
| 48 | A165-167B109-119C141-169D247E155F268-272G406H187-189I406-408         |
| 49 | A167B107-125C137-147D263-273E155-157F266G406H195I400-402             |
| 50 | A165-167B113-129C137-139D261E155F270G406H189-195I402-410             |
| 51 | A167B111-125C137-139D257E153-157G406H195-197                         |
| 52 | A167B125-129C137-139D251-269E157F270G406H195I400                     |
| 53 | A167B125-127C137-139E151-155F266G406H191-199I396-400                 |
| 54 | A167B111-117C139D251E151-155F268G406H187-189I400                     |
| 55 | A165-167B111-126C139D257-277E151-155F270G406H195-199I396-400         |
| 56 | A167B125-129C139E151-155F272G406H189-195I408-418                     |
| 57 | A167B109-129C139D247-251E155F266G406H189-193I406-408                 |
| 58 | A165-167B107-125C137-139D263-275E153-155F270G406H189-195             |
| 59 | A167B109-125C143-149D255E155G406H187-189                             |
| 60 | A165-167B113-125C137-139D277-299E151-155F270G408H189-191I390-400     |
| 61 | A165-167C137-139D263-269E151-153F268-274G406-412H191-197             |
| 62 | A167B111-117C137-139E151-155F268-270G406H191-197                     |
| 63 | A165B109-121C139D263E155G406H193-197I400-402                         |
| 64 | A167B115-127C137-139D291-293E153-155F270G406H189-195I402             |
| 65 | A167B121-125C137-139D255E151-153F270G406H187                         |
| 66 | A167-165B111-119C141-151D271-277E151-155F270G406H195I404-410         |
| 67 | A163-167B109-125C137-139D261-271E151-155F270G406H189I394-410         |
| 68 | A165-167B121-127C139-143D271-283E151-155G406H189-197I402             |
| 69 | A165-167B117-121C137-139D281E153-157F266G406H189I396-402             |
| 70 | A167B111-117C137-143D247-251E153F270G406H195-197I396-402             |
| 71 | A167B121-125C137D257-291E153F268G406H189-195                         |
| 72 | A167B117-121C137-143E151-157F274G406-412H189-195I400                 |
| 73 | A167B125C137D273-289E153-155F274G406H189-195I398-400                 |
| 74 | A165-167B109-125C139-141E151-153F266-270G408H195I392-402             |
| 75 | A167B109-121C139-145F266G408-414H195I404-412                         |
| 76 | A165-167B111C139D251E151-155F270G406H187-195                         |
| 77 | A165-167B129-131C137-139E151-155F266-270G406H195                     |
| 78 | A165-167B111-121C139-141D265-283E153-155F270G406H195-197             |
| 79 | A165-167B109-119C137-151D279-281E155F270G406-412H195-197I396-402     |
| 80 | A167B119-121C137-151D297-299E153-155F266G406H189-197                 |
| 81 | A165-167C137-159D247E153F266G406H195                                 |
| 82 | A167B109-116C137-139D249E151-153F268-272G406H195-199I404-418         |
| 83 | A167B109-121C137-159D267-281E153F268-272G406-422H189-193             |

---

---

|     |                                                                      |
|-----|----------------------------------------------------------------------|
| 84  | A165-167B119C137D259-271E153-155F268G406-412H195I400-402             |
| 85  | A167B109C137D249-251E153-155F266-268G406-412H195                     |
| 86  | A165-167B109-121C137-139D253-257E153F270G406H193                     |
| 87  | A165-167B111-129C137D249-279E153G408H189-199I400-402                 |
| 88  | A165-167B109-125C137D251-275E153-155F270G406H195-197I400-402         |
| 89  | A167B109C139-151E153F266G406H197-199                                 |
| 90  | A167B129C139-151E153F266G406H195                                     |
| 91  | A165-167B115-121C137-139E155F266-268G406H195-199I418-420             |
| 92  | A165-167B109-113C151-159D291-293E153F266G406-412H195-197I418         |
| 93  | A165-167B117-121C137-139E153-155F270G406H195                         |
| 94  | A167B109-117C137-159D321-323E155F266G406H195-197                     |
| 95  | A179B107-109C143D283-291E157-161F266-270G422H187-209I384             |
| 96  | A165B125-129D247E151-153F268G406-412H187I418                         |
| 97  | A167B111-125C137-139D247-263E151-155F266G406H195                     |
| 98  | A167B125-129C137-139D249-257E151-153F268-272G406H195                 |
| 99  | A167B125-129C157-159D247E151-153F266G406-412H197-199I422             |
| 100 | A167B111-113C139-143D263E153-155F270G406H189-197                     |
| 101 | A167B122-129C137-139D249E153-155F266G408-414H195                     |
| 102 | A165-167B115-129C137-147D267-273E153-155F268-272G406H195-199         |
| 103 | A167B111C137-151E151-153F266G406-412H189-197I418                     |
| 104 | A165-167B115-131C137D293E153-155F266G406H191-193I404-412             |
| 105 | A167B111-125C137-159D259E153F266G406H187-189                         |
| 106 | A165-167B121-125C139-159D249-257E153F266G406H187-197I418             |
| 107 | A165-167B113-125C137D253-263E153F266G406-412H189-197                 |
| 108 | A167B111-121C147-159D255E153F266G406H189-195                         |
| 109 | A167B119-127C139-155D271E153-155F268G406H195-199I420                 |
| 110 | A167B121C137-139D245E153-155G406H191I404-418                         |
| 111 | A165-167B117-125C137-169D247E151-153F270G406H189-197I402             |
| 112 | A167B115-121C137-169D247-269E153-155F268G406-412H195-197I414-420     |
| 113 | A167B113C137-139D249-251E153-155F266G406H189-191                     |
| 114 | A165-167B115-125C137-147D299-301E153F266G406H195-197                 |
| 115 | A165B111-117C147-151E153F266G406H195-197                             |
| 116 | A165-167B111D249-255E151-161F268-270G406H189-197I400-402             |
| 117 | A165-167B111-121C145-155D247E153F266G406H189                         |
| 118 | A167B125-129C137-139D249-251E153-155F266G406H187-195I418             |
| 119 | A165B111C137-151D249E153-155F270G406H189-195I396-402                 |
| 120 | A165-167B117-121C137D247-263E155F268G408-414H189-193I384-398         |
| 121 | A165-167B115-125C137-139D249-263E151-153F274G408-414H189-193I400-414 |
| 122 | A167B115-117C137-139D271E151-155F270G406H195                         |
| 123 | A165-167B111C137-143D249E151-153F270G406-412H193-195I402             |
| 124 | A167B111-117C137D243E157G406-412H189                                 |
| 125 | A165B117-125C137D247E151-153G406H189-195I410                         |
| 126 | A167B119-125C137-143D267-289E151-155F268-282G406H193-195             |
| 127 | A165-167B117-125C137-139D265E155F274G406H189-195I384-400             |

---



---

|     |                                                                      |
|-----|----------------------------------------------------------------------|
| 128 | A167B117-119C137D251-255E155F274G406H189-195                         |
| 129 | A165-167B111-129C137D273E153-155F270G406H189-195I402                 |
| 130 | A165-167B117-119C137-139D249E155F268-272G406H195I384-398             |
| 131 | A165B117C137-139E155F268G406H189                                     |
| 132 | A167B117-125C137-151D251-271E155F274G406-412H195I422                 |
| 133 | A165-167B117C137D253-263E155F274G406-412H187-195                     |
| 134 | A167B111-117C137D247E153-155F266-272G406H189-195                     |
| 135 | A167B111-117C137-139D289-291E155-157G406H195                         |
| 136 | A167B117-129C137-139D247-271E155G406H189-195                         |
| 137 | A175B105C133-145D255E163-167G412H201-207                             |
| 138 | A175-193B103-105C135-153D271-275E161F268-270G412H187-209             |
| 139 | A171-173B105C133-153D271-279E155-163F268-272G412H187-209             |
| 140 | A173-175B105C135-155D259-269E167G412H189-197I400-406                 |
| 141 | A171B105C145-155D291-293E157-163F272-274G412H191-193I384-396         |
| 142 | A173-175B105C149-155D285-291E161-163F270-272G412H187-191I396-404     |
| 143 | A173-175B105D291-293E163-167F270-272G414H191                         |
| 144 | A173B105C155-157D269-271E159-163F270-272G414H193                     |
| 145 | A173-179B105C157-165D255-267E163-169F272-274G412H193-199             |
| 146 | A173B105C149-167D269-277E161-169F268-270G410H187-193I386-400         |
| 147 | A173B105-109C155-157D255-269E161-169F268-272G412H193                 |
| 148 | A171-173B105C135-141D251E155-159F268-272G418H209-217I384-390         |
| 149 | A171B105C135-165D277-279E161-169F272-282G410H187-217I390             |
| 150 | A167B105C135D253-277E157-159F268-274G412-418H193-225I390             |
| 151 | A171-177B105C135-147D253-279E157-159F272-274G412H207-225             |
| 152 | A167-171B105C135-141D251-279E155-159F268-272G418H209-215I384         |
| 153 | A171-177B105C147D269-291E161F268-274G412H187-193I384                 |
| 154 | A173-179B105C155-157D265-269E161F268G412H193-203                     |
| 155 | A167-171B105C137-159D251E159-161F268-272G418H207-209I384-396         |
| 156 | A175-177B105C157-159D251E155-161F268-282G412-418H187-195I384-386     |
| 157 | A173-179B105C155-157D269-291E159-161F272G412H187-193                 |
| 158 | A171B105-109C141-147D255-265E159-167F272-274G410-412H193-203I382-390 |
| 159 | A171-187B105C147-155D269-275E157-161F268G412H187-193I384             |
| 160 | A167-171B105C137-161D251-255E157-163F272-274G412-420H193-209I384-390 |
| 161 | A173-179B105-109C155-157D263-265E159-161F272G412H191-203             |
| 162 | A171-187B105-109C147D265-291E155-159F268-272G412H187I384             |
| 163 | A173-177B105-109C147-165D275-291E161F268-274G412H187I386-390         |
| 164 | A173B105C135-157D275-285E161-163F268G414-420H195-207I396             |
| 165 | B105C137-147E161F268G414H189-193I386-400                             |
| 166 | B105C137E159G414H189-193I396                                         |
| 167 | A173B105C133-135D275-285E161F268G412H189-195I400                     |
| 168 | A171-173B105C143-147D279-285E161-163F270G412-418H195-201             |
| 169 | A171-177B105C143-157D275E157-163F268G414-420H201-207                 |
| 170 | A173-177B105C135-157D275-285E157-161F268-270G412H195-207I396-396     |
| 171 | A177B105C155-157D269-279E161-163F268G418I390-402                     |

---

---

|     |                                                                      |
|-----|----------------------------------------------------------------------|
| 172 | A171-173B105C147-157D267-279E161-163F268G418H195-201I390-400         |
| 173 | A175-187B105-109C135-155D255-271E157-161F268-270G412-426H193-205     |
| 174 | A177B105C137-155D269-283E161-169F270-282G412H187-197I384             |
| 175 | A171B105C145-159D261-283E157-169F274-282G412H193-197I384-396         |
| 176 | A171-175B105C147-157D243-261E153-169F268-274G370-414H191-193I376-386 |
| 177 | A169B101-105C149-153D265E161-163F268G412H207                         |
| 178 | A171-173B105C137-149D277E161-167G412H187-195I386-390                 |
| 179 | A163-173B105-109C137-161D255-257E161-167F268G414H203I374-382         |
| 180 | A173-177B105C135-137D275-283E161-165F268-274G412-414H193-199I386-390 |
| 181 | A165-179B105C137-141D253-279E157-161G414H191-201I396-406             |
| 182 | A173-181B105C137-151D251-265E155-167F268-270G414H187-199             |
| 183 | A165-173B105C151-157D301-303E165F268-278H193I384-390                 |
| 184 | A179-181B105C145-157D261E157-167F268-270G412H189-203I384-386         |
| 185 | A167-173B105-111C153-157D259-265E163F268-272G412H193I380-384         |
| 186 | A179-187B105C135-157D265E161-165G412-414H197I380                     |
| 187 | A181-189B105C149-159D257-265E159-167F268-270G414H187-213I386-390     |
| 188 | A171-173B105C153-157D265-279E163-167G412-414H207I382-386             |
| 189 | A167-187B105C137-157D281E161-167G412-414H187                         |
| 190 | A171B105-107C149D247-257E157-167G412-420H193-209I386-390             |
| 191 | A171B105-111C149-157D247E165-167F268-270G412H205-207I372-384         |
| 192 | B105C151-155D263E157-167H197-205I384                                 |
| 193 | A171-173B105C149-155D257-283E157-169F268-270G412-418H193-197I388-390 |
| 194 | A165B105C141-149D267-269E157-171G422H193-199                         |
| 195 | A165B105C141-149D257-269E157-167G412H191-193                         |
| 196 | A163-179B105-107C135-155D255-257E161G412H207-209I384-386             |
| 197 | A171-175B105C157D265-275E161G412H187-193                             |
| 198 | A173-179B105C135-153D247-249E161F270-274G412H187-209I384-386         |
| 199 | A165-171B105C141-153D257-263E165F268-270G410H191-205I374-386         |
| 200 | A171-177B105C149-165D255-259E157-161F270G412-420H187-191I374-386     |
| 201 | A171-175B105C135-153D257-273E167-169G412H187-191                     |
| 202 | A167B105C137-143D265-283E159-167G412H185-195I386-388                 |
| 203 | A165-173B105C135-157D263-269E163-171F268-274G412H187-203I390         |
| 204 | A179B105C155-159D257-269E163F266-270G414H187-191I384-386             |
| 205 | B105C159D255E161-169F266-268G414H203-209I384-388                     |
| 206 | A171-173B105C149-153D257E157-165G412-414H193-211                     |
| 207 | A171-183B105C149-151D257-261E157-159F268-272G412H209-211             |
| 208 | A173B105-107C157D263-265E157-171F270-272G412H187-209I384-386         |
| 209 | A173-175B105C139-151D257-269E161-171F268-270G414H193-207I386-388     |
| 210 | A167-191B111C135-139D267-281E159F268G412-414I388                     |
| 211 | A171-179B105C149-153D259-265E159-161F268-270G412H205I384-386         |
| 212 | A203-205B105-107C141-157D263E155-157F266G414H185-195I383-391         |
| 213 | A205B105-109C133-143D271E161-163F268G416-422H187-193                 |
| 214 | B105C133-151D253E157-163F268-272H187-199                             |
| 215 | B105-107C133-143D287-289E157-161F268-272G418-422H197-203I384         |

---

---

|     |                                                                          |
|-----|--------------------------------------------------------------------------|
| 216 | A181B105-117C139-151D253E163-167G416-420H187-199                         |
| 217 | B105C133-157D277-291E157F268-270G416-420H187I384-386                     |
| 218 | A203B105C133-149D271E159F268-272G428H199-205I384                         |
| 219 | A179B105-109C135-151D271-273E155-157F268-270G418-428I384                 |
| 220 | A203B105-109C139-149D251-289E161-163F268-274G418-422H197I384-386         |
| 221 | A179-207B109C141-149D247-249F272G404-410H187-197I376-384                 |
| 222 | A179-205B105C145-163D253-265E157F268-272G424H185-199I384-386             |
| 223 | A203-205B105-109C149-151D253-289E155-171F270-272G422-424H197-201I388-392 |
| 224 | A171-205B109C153-163D273-287E157-163F268G404-424H189-193I384-386         |
| 225 | A179-181B105-107C139-151D265E155-161F270-272H185-199I384-386             |
| 226 | A179B109-119C143D259-277E161-163F274-280G420-422H195-199I384-386         |
| 227 | A179B105-109C141D249-285E157F266-268G418-422H189-199I386-388             |
| 228 | A179-203B105-109C133-155D253E155-163F270-274H189-197I386-396             |
| 229 | A179-181B105-107C141D277-285E157-159G418-424H189I386                     |
| 230 | A171-177B107-109C141-155D259-273E155-157F268-272G402-422H193-205I384-386 |
| 231 | A179B107-109C141-151D273-285E157F264-268G422-428H187-189I384-386         |
| 232 | A179-185B109C143-145E157-161F272-274G408-422H197-205                     |
| 233 | A179-181B105-119C147D251-264E161F270-272G402-416H187I384-386             |
| 234 | A175-181B105C139-145D251-264E157-161F270-272G416-422H187-195I384         |
| 235 | A175-177B107C141D255-273E155-163F268-272G402-428H187-189I384-386         |
| 236 | A179B107-109C143-147D259E161F268-270G424-428H195I384-388                 |
| 237 | A177-179B105-107C133-155D273E159-161F270-272G422-428H197-199I384-386     |
| 238 | A201B107C133D273-285E161F268-270G422-428H187-193I384                     |
| 239 | A179B105C147-161D261E157-163G424H195-199I384                             |
| 240 | A179-181B105C133-145D249-261E159-163G424H195-199I384-392                 |
| 241 | A181-201B105-107C141D249-265E161-163F268-270G420-422H187-193I384-386     |
| 242 | A165B107C133-141D271E161-163F272G416-422H199                             |
| 243 | A177-205B105-107C141-161D259E157-163F268-274G428-430H199I386             |
| 244 | A179B107-109C133-145D265-273E155-159G416-422H189I384-398                 |
| 245 | A179-181B107-109C133-141D273E159-161G422-430H193-199I384-390             |
| 246 | A179-205B105-107C133-143D251E161-163F268-280G420H193-209I384-388         |
| 247 | A205B107-109C139-141D251E157-163G422H187-189I384-388                     |
| 248 | A205B105-109C139-147D251-255E161-163F268-270G420-422H199-203             |
| 249 | A179-207B105-109C155-161D247-283E163-177F268-274G422H193-195I384-386     |
| 250 | A181-207B105-107C133-161D251E157-163G422H189-199I384-384                 |
| 251 | A175-205B107C141D251-255E163G418-422H189I384-384                         |
| 252 | A201-207B105C133-151D277E157F270-276G422H195-201I384-388                 |
| 253 | A179B105C155-161D271-273E155-157F272H195                                 |
| 254 | A203-207B105-107C143-161D273-285E157-159F268-272G408-428H195             |
| 255 | A179-207B105-107C143-161D275E159-161G418-422H195-199                     |
| 256 | A179-205B107-109C143-161D285E163F270-272G408-428H189I384                 |
| 257 | A179-205B105C133-161D251-273E155-159F268-272H189-195I384                 |
| 258 | A177-205B105-107C133D277-291E159-161F268G416-422H187-189I384             |
| 259 | A177-181B107-109C141-143D281-283E157-167F268-274H197-199I384             |

---

---

|     |                                                                          |
|-----|--------------------------------------------------------------------------|
| 260 | A167-169B105C137-147E153-157F268-274G424-430H191-203I384                 |
| 261 | A203-205B107C143-161D251-285E161-163F268-272G408-422H189I384-388         |
| 262 | A179-203B105-109C133-147D297-299E161-167G422-430H189-199I384             |
| 263 | A171-181B105-109C133-143D253E161-163F272-274G422-428H187I384-386         |
| 264 | A179-181B107C149-157D293-295E157-159F268-270G422-430H187-197I384         |
| 265 | A179-185B109C143-145D253E157-161F272-274G408-422H187-197                 |
| 266 | A183-203B105-107C155D283E161-163H187-195I384                             |
| 267 | A179-203B107-109C141-143D251E163-165F268-270G420-426H187-199             |
| 268 | A177-179B109C143-155D263-277E157F268-268G422H199-203I384-386             |
| 269 | A179-183B107-109C143-155D253E157-161G422-428H193-211I376-384             |
| 270 | A179-181B105-109C141-143D277-285E161-163F266-270G422H189-199I384-386     |
| 271 | A179-181B109C143-145D273E159-163F268-268G414-420H195-203                 |
| 272 | A179B109C133-155D253E161F268-268G420-422H189-203I384-398                 |
| 273 | A179-199B109C139-155D273-285E161-163G414-422H189-195I384-386             |
| 274 | A181-199B109C149-155D273-275E155-161G420-422H187-199I384-390             |
| 275 | A179-199B107-109C141-155D257-273E161F266-270G420-422H185-199I384         |
| 276 | A179B105C133-141D283E157-163F270-274G416-422H195-199I384                 |
| 277 | A179B105-109C141-147D249-277E157-161F266-270G422H199                     |
| 278 | A179-183B105-109C133-141D273-277E157-159F270-276G414-422H189-199I384-388 |
| 279 | A177-181B105-109C139D289-291E155-161F268G420-422H193I384-386             |
| 280 | A177-179B105-109C143D277-279E155F266-268H189-199I384-386                 |
| 281 | A183-205B105C133-139D275-283E157-163F268-270G422H187-189                 |
| 282 | A183-205B105C133-143D273-275E161-163F268-274G420-422H187-189             |
| 283 | A181-205B105-109C143-151D287E155-163F266-268G422H187-189                 |
| 284 | A205B105C133-149D263-275E157-163F268-274G420H189-199I384                 |
| 285 | A169-179B105C133-143D251-275E161-163F272-274G420H189I384                 |
| 286 | A179-205B105-111C133-139D251-275E159-163F268-274G412-420H187-189I388-398 |
| 287 | A205B105-109C133-139D275-293E157-163F274-276G422-426H189-193             |
| 288 | A203-209B109C139-143D253-275E161F266-270G420-422H189-213I384             |
| 289 | A165-185B101-113C133-135D251-257E157-161G420H191-207I390                 |
| 290 | A177-183B113-115C143-153D253F268H187-197                                 |
| 291 | A167-181B105-111C141-153D265-289E157-159F268G410H189-195                 |
| 292 | A165-167B111C153-157D257E159-163F268-270G418-420I384-386                 |
| 293 | A171-173B105-111C145-175D255E159F266G412-420H189-195I388-390             |
| 294 | A175-179B109-113C137-155D253-257E159-163F270G412-424H197-201             |
| 295 | A167-169B105C157E155-161F270G412H189-197I372-384                         |
| 296 | A169-185B101-111C143D319E163-165F270G422-426H197                         |
| 297 | A165-177B101-111C133-153D297-301E161-163F268-270G414-420H197I390         |
| 298 | A173-189B105-111C141-153D249E157-161F268G418-420H191I386-388             |
| 299 | A177-179B111C133D275E159F268-274G418-430H201-203I376                     |
| 300 | A183-185B117C143-149D283-285E159-163F270-274G416H189-195                 |
| 301 | A165-173B111C141-155D257E157-167F268-270G412H189-197I386-390             |
| 302 | A165-177B105-111C147-161D279-281E157-161F268-274G412H193-195             |
| 303 | A165-181B107-111C133-141D295-297E159-165F268-270G414-416H207-213I386-390 |

---

---

|     |                                                                      |
|-----|----------------------------------------------------------------------|
| 304 | A165-169B101-113C143-145D253E161-163F268G418H191-197I386-390         |
| 305 | A165-185B099-101C133-143D265E159-163F268G418I390                     |
| 306 | A167-173B101-117C153-161D279-297E157-165F268-272G410H197I382-390     |
| 307 | A181B111-113C151-177D253-257E157-167F268-270G408-416H191-193I386-390 |
| 308 | A165B117-119C157D253-257E159-161F268-270G424                         |
| 309 | A187-199B111-121C157-161D293-295E161F270G412-422H195                 |
| 310 | A173B111-113C137-141D257E157-161F274G412H187-207I386-390             |
| 311 | A165-185B113C141-175D273-275E161F260-272G426H187-189I382-386         |
| 312 | A181-199B113C141D269-275E155-163F268-272G412H189-203                 |
| 313 | A169-181B113-119C143-149D251E161-163F268G416-422H192-194I390         |
| 314 | A167B117C133-175D283-285E159F268G414H187-195I384-392                 |
| 315 | A167-181B115-117C133-159D257E159-163F268-274G410-416H199-207I384-392 |
| 316 | A173-183B105-111C149-161D283-285E157-159F268G420-422H195-197I394-396 |
| 317 | A167-185B105-119C133-149D285-287E159-163G412-414H187-189             |
| 318 | A175-177B105-117C143-151D253-261E159-161F270-274G410-430H187-193     |
| 319 | A173-177B107-119C141-149D253E163G418H187-219I284-290                 |
| 320 | A165B113-119C151-153D249E161-163F270-272H197-203I385-388             |
| 321 | A165-185B113C149-153D273-275E163G412H187-189I385                     |
| 322 | A167-173B111C141-149D285-287E159H197I390-392                         |
| 323 | A167-195B111-117C149-153D293E155-159F268G414-426H189-197I382-386     |
| 324 | A169-189B111-113C133-153D249E161-165F268G414-426H193I390-396         |
| 325 | A167-173B105-111C157-161D257E157-163F268G410-410I382-382             |
| 326 | A183-197B111C131D251E159-161F268-270G410H193-201I384-388             |
| 327 | A165B103-117C153-161D257-289E157-161F268-270G416H193-197             |
| 328 | A165B107-117C147-153D293-295E157-161F268G414-418H189-197I390         |
| 329 | A165B101-119C147-161D297-299E159-161F268-270G410-412H189-199I388-390 |
| 330 | A177-183B111-117C133-157D251E159F268-274G414H193-197I384-388         |
| 331 | A175-191B113-115C147D255E165-169G416-424H195-197I372-386             |
| 332 | A173B111-113C141-149D281-283E157-161G418H193-195                     |
| 333 | A167B105-113C149-151D291-293E159-163F270G410H191-201                 |
| 334 | A165B103C141-153D253E159-161H191-199                                 |
| 335 | A167-171B101-111C141-153D253E155G412-422H195                         |
| 336 | A167-177B101C139-149D253E161-163F270-274G412-414H191                 |
| 337 | A165-171B115-117C149-175D269-271E159G416-430H195-197I386             |
| 338 | A169B105-113C149-153D273-275E155-161G414-424H191-193                 |
| 339 | A165B111-113C139-141D275E159-163G420-422H187-189I378-382             |
| 340 | A165-177B101-113C155-167D247-263F270-272G414H191-193I386             |
| 341 | A167-171B111-117C153-155D247F268-270G414H191-199I384-386             |
| 342 | A165-177B109-113C145-161D251E159-163G416-422H197-199                 |
| 343 | A165B109-111C145-153D247-299E155-159F270G416-422H186-194             |
| 344 | A181-185B111-117C143D251E155G416H197-209I388                         |
| 345 | A165-185B107-109C155-161D253E161-163H199I390-392                     |
| 346 | A165-187B109-111C151-161D291-293E161-163F268G412-430H195-207I388-390 |
| 347 | A183-185B113-121C141-157D283-285E155-161G412H191-197I388-390         |

---

---

|     |                                                                          |
|-----|--------------------------------------------------------------------------|
| 348 | A181-183B113-115C141D271-281E159-161F268-272G412-416H195-197             |
| 349 | A169-181B111-119C149-157D253E159-161F268-274G414H205-209I388             |
| 350 | A169-181B111-119C149-157D253E159-161F268-274G414H205-209I388             |
| 351 | A165-173B107-117C137-143D267-285E157-165F270-278G420-424H187-199         |
| 352 | A165-175B111-113C139-153D283E157-161F268-270G418H187                     |
| 353 | A175-187B111-117C143-153D253-283E155-163G418H187-213                     |
| 354 | B105-111C153-159D253-283E159F268G414-418H189-199I386-388                 |
| 355 | A167B101-111C149-153D263-275E157F270-278G426-428I388-390                 |
| 356 | A165-175B109-113C143E157-159F268-270G414-428H187I388-392                 |
| 357 | A165-175B109-113C149-153D251E157-161F270-278G412-416H197-199             |
| 358 | A165B101-111C153-169D255-257E157-159F270-276H189-197I382                 |
| 359 | A165-181B109-111C143-145D257E157-163G410-418H187-189                     |
| 360 | A165-213B111C145-161D285-287E157-161F268-272H187-199I390                 |
| 361 | A165-213B111C147-155D253-257E155-159F268-274G410-418H187-189I384-392     |
| 362 | A165-167B101-113C149-169D267-271E161-163G414-416H187-189                 |
| 363 | A179-181B107-111C145-155D273-275E157-161F270-278G416-422H187-189I382-388 |
| 364 | B101-111C145-157D243-259E153-161F268-270G410H185-187                     |
| 365 | A165-177B111-113C149-171D259-271E159F268H201-211I388-390                 |
| 366 | A181-187B107-111C139-149D257-287E159-161G410-424H199-205I388-392         |
| 367 | A165-169B101-107C149D275E159-161F268G422-430H189-199                     |
| 368 | B111C139-153D253-283E161-163F268G414-424H197-199I388-390                 |
| 369 | A165-185B111C143-147D253-257E159-163G410-418H187-189                     |
| 370 | A211-213B101-107C143-153D253E159-163F268H195-199I388-390                 |
| 371 | A175-181B107-113C137D253-285E157-161F268G420I384-386                     |
| 372 | A171-175B113C137-161D285-287E161-165F270-274G418H195-197                 |
| 373 | A175-177B101-105C141-149D253-267E159-165F260-270G424-430H191-193         |
| 374 | A167B111-113C137-145D293-295E161-163F268-274G422-430H191-195I388         |
| 375 | A173-179B111C149-161E159-163F268-270G446H179-195                         |
| 376 | A167-179B107-109C141-149D285-287E161G420-426H199-203I388-390             |
| 377 | A175-179B099-101C153D247E161-163F268-274G420-424H191-195I392-394         |
| 378 | A179B111-113C141-143D285-287E161F268G412-422                             |
| 379 | A177B105-111C145-147D263E161-163F268-274G412-414H197-203I384-392         |
| 380 | B101-113C141D279-285E157-163F268-270H191-205I388-392                     |
| 381 | A165-187B105-113C161-165D259-297E159-163F270-276G418-446H193-199I378-388 |
| 382 | A177-179B109-111C139-159D277E163-165G446H201-203I386-388                 |
| 383 | A171-205B105C137-155D263-301E155-161G412-424H195-199I388-398             |
| 384 | A165-175B111-115C137-149D249-275E155-165F268-270G414-420H199I390-392     |
| 385 | A171-177B107-117C143-153D247E161-163F270-276G412-414H189-201I386-390     |
| 386 | A175-177B109-117C149-153D247-271E157-163G414-426H191-203                 |
| 387 | A169-185B107C141-143D275E159-161F268-270G412-430H199-205I390             |
| 388 | A179-189B097-111C147-153D259E159-161F268-270G412H195-207                 |
| 389 | A169-175B105-107C137D311-313E159F268-270G412-424H187-201I386-388         |
| 390 | A165-169B107-119C147-159D277-283E161F270-272G413-423H193-199             |
| 391 | A165-185B105-107C137-143D275E159G410-430H197-199                         |

---

---

|     |                                                                          |
|-----|--------------------------------------------------------------------------|
| 392 | A165-181B101-111C137D291-293E159-161F270-276G412I386-388                 |
| 393 | A175-179B107-111C143-159D255-261E159F268-272G412H193-199                 |
| 394 | A165-181B105-111C141-157E159F270G412-418H187-199I386-384                 |
| 395 | A171-183B105C149-153D297E157-163F270G418-422H187-197I384-388             |
| 396 | A169-171B101-109C147-157D251E159-165G412-418H191-195I386-388             |
| 397 | A171-183B111-113C141-157D279E159-167F268-270G402-418H191-193I386-388     |
| 398 | A171-175B115C141-147D283-297E155-157F268-270G420H199-205I286-396         |
| 399 | A175-179B105-111C133-135D285-303E159-165F268-274G410-418H193I384-392     |
| 400 | A165-167B107-113C153-157D291-293E155-159F268-270G412-426H191-203I388-396 |

---

<sup>1</sup>Letters represent alleles: A: Qden03011; B: Qden03032; C: Qden03021; D: QrZAG96; E: QrZAG7; F: QrZAG112; G: QrZAG102; H: Qden05031; I: Qden05011. Samples 1~136 are *Q. variabilis*; 137~210 are *Q. aliena*; 211~287 are *Q. dentata*; 288~400 are *Q. mongolica*.
